# Supplementary material
Source: Springer Nature journal article supplement (https://www.springermedizin.de/resource/supplementary/12981_2009_118_MOESM5_ESM.pdf/9603862)

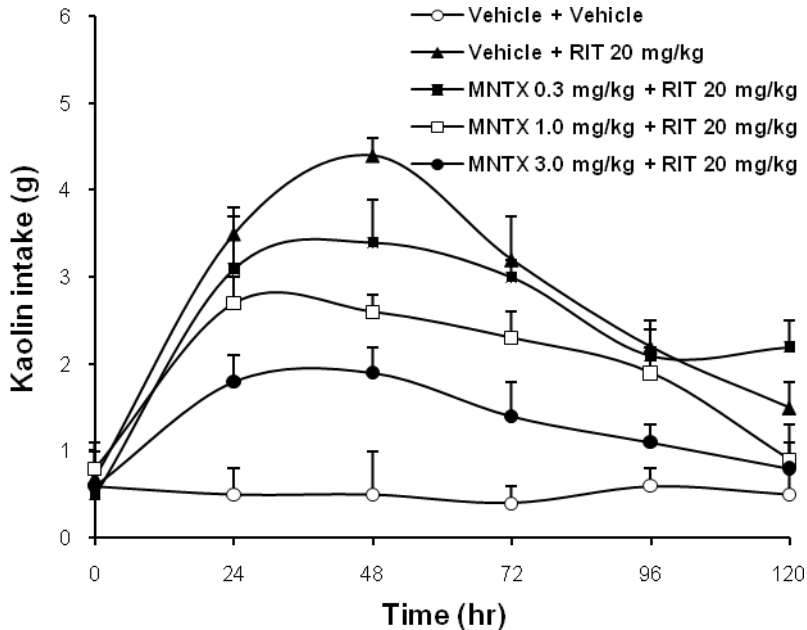

Supplement: MOESM5 [file 9603862]
